# Supplementary material for: Macular dystrophies: clinical and imaging features, molecular genetics and therapeutic options
Source: PubMed Central journal article supplement (PMC7147237; doi:10.1136/bjophthalmol-2019-315086), 2019-11-08
Supplement: bjophthalmol-2019-315086supp001.pdf [file bjophthalmol-2019-315086supp001.pdf]

Supplementary Table: Genetics of Retinal Dystrophies and Avenues of Intervention (as of September 2019)

| Disease                          | OMIM # | Gene   | Inheritance Mode | Drug                                                                                                    | Avenues of Human Intervention                                                                                                                                                                                                                                                                                                           |                                                                                           |
|----------------------------------|--------|--------|------------------|---------------------------------------------------------------------------------------------------------|-----------------------------------------------------------------------------------------------------------------------------------------------------------------------------------------------------------------------------------------------------------------------------------------------------------------------------------------|-------------------------------------------------------------------------------------------|
|                                  |        |        |                  |                                                                                                         | Mechanism of Action                                                                                                                                                                                                                                                                                                                     | Clinical Trial                                                                            |
| <b>Stargardt disease</b>         |        |        |                  |                                                                                                         |                                                                                                                                                                                                                                                                                                                                         |                                                                                           |
| STGD1                            | 248200 | ABCA4  | AR               | <b>Visual cycle modulators</b><br>A1120<br>Fenretinide<br>STG-001<br>Soraprazan<br>Emixustat<br>ALK-001 | Competitive inhibitory mechanisms on the retinal binding protein-4<br>Competitive inhibitory mechanisms on the retinal binding protein-4<br>Competitive inhibitory mechanisms on the retinal binding protein-4<br>Removal of lipofuscin in RPE cells<br>Modulating the activity of RPE65<br>Decrease the rate of Vitamin A dimerization | Phase II<br>Phase III (NCT03772665) and Phase IIa (NCT03033108)<br>Phase II (NCT02402660) |
|                                  |        |        |                  | <b>Antioxidant</b><br>Saffron                                                                           | Antioxidant Supplement                                                                                                                                                                                                                                                                                                                  | Phase I/II (NCT01278277)                                                                  |
|                                  |        |        |                  | <b>C5 inhibitor</b><br>Avacincaptad pegol                                                               | Complement C5 inhibitor                                                                                                                                                                                                                                                                                                                 | Phase II (NCT03364153)                                                                    |
|                                  |        |        |                  | <b>Gene Therapy</b><br>SAR 422459                                                                       | Lentiviral vector gene supplementation                                                                                                                                                                                                                                                                                                  | Phase I/IIa (NCT01367444) and Phase I/II (NCT01736592)                                    |
|                                  |        |        |                  | <b>Cell Replacement</b><br>MA09-hRPE                                                                    | Subretinal human embryonic stem cell (hESC) derived RPE cells                                                                                                                                                                                                                                                                           | Phase I/II (NCT01469832)                                                                  |
| STGD3                            | 600110 | ELOVL4 | AD               |                                                                                                         | NA                                                                                                                                                                                                                                                                                                                                      |                                                                                           |
| STGD4                            | 603786 | PROM1  | AD               |                                                                                                         | NA                                                                                                                                                                                                                                                                                                                                      |                                                                                           |
| <b>Best disease</b>              | 607854 | BEST1  | AD               |                                                                                                         | NA                                                                                                                                                                                                                                                                                                                                      |                                                                                           |
| <b>Retinoschicis</b>             | 312700 | RS1    | X-linked         | <b>Carbonic anhydrase inhibitors</b><br><b>Gene Therapy</b>                                             | Alter the fluid transport mechanism across the RPE<br>Intravitreal AAV gene supplementation                                                                                                                                                                                                                                             | Phase I/II (NCT02416622 and NCT02317887)                                                  |
| <b>Pattern dystrophy</b>         | 169150 | PRPH2  | AD               |                                                                                                         | NA                                                                                                                                                                                                                                                                                                                                      |                                                                                           |
| <b>Sorsby fundus dystrophy</b>   | 188826 | TIMP3  | AD               |                                                                                                         | NA (Anti-VEGF for complicated cases with CNV)                                                                                                                                                                                                                                                                                           |                                                                                           |
| <b>Autosomal dominant drusen</b> | 601548 | EFEMP1 | AD               |                                                                                                         | NA (Anti-VEGF for complicated cases with CNV)                                                                                                                                                                                                                                                                                           |                                                                                           |

AR: autosomal recessive, AD: autosomal dominant, NA: not available, RPE: retinal pigment epithelium, VEGF: vascular endothelial growth factor, CNV: choroidal neovascularization
